# Supplementary material
Source: PubMed Central journal article supplement (PMC6347724)
Supplement: pnas.1812266115.sapp.pdf [file pnas.1812266115.sapp.pdf]

## Supplementary Information for

### **Blocking IL-1 $\beta$ reverses the immunosuppression in mouse breast cancer and synergizes with anti-PD-1 for tumor abrogation**

Irena Kaplanov, Yaron Carmi, Rachel Kornetsky, Avishai Shemesh, Galina V. Shurin, Michael R. Shurin, Charles A. Dinarello, Elena Voronov and Ron N. Apte

Corresponding author: Ron N. Apte  
Email: rapte@bgu.ac.il

#### **This PDF file includes:**

Figs. S1 to S3  
Tables S1 to S2

## Supplementary Information Text

Fig. S1.

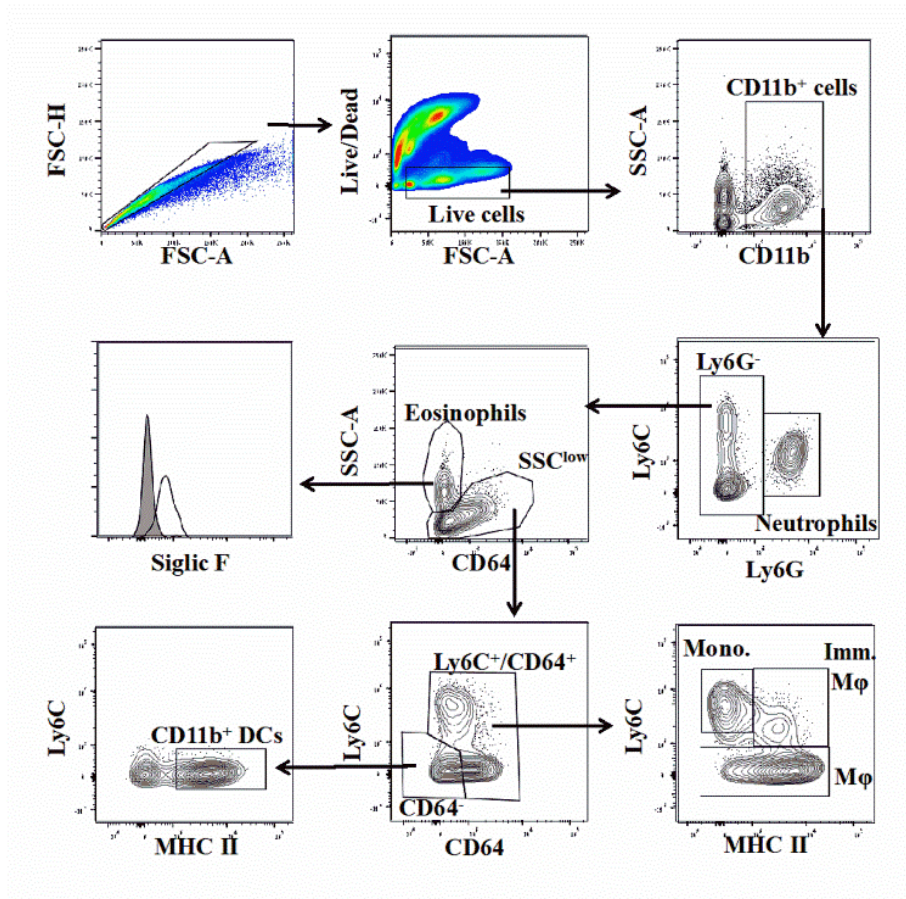

**Myeloid cells gating strategy.** Gating strategy for identification of myeloid cell populations. Starting from the upper left, arrows indicate directionality of sub-gates. Markers are indicated to the left and bottom of each polychromatic dot plot. Identified populations are marked in black text.

Fig. S2.

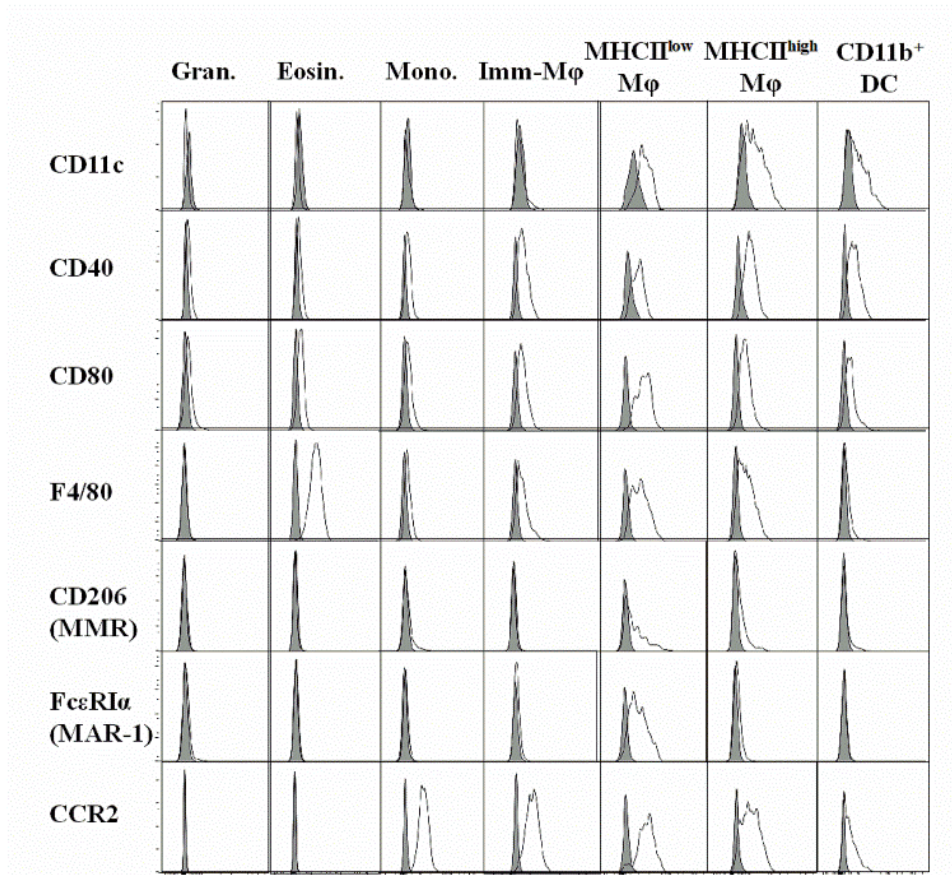

**Myeloid cells surface antigens.** 4T1 tumor-derived myeloid cells were analyzed by Flow cytometry for different membrane antigens. Markers are indicated to the left and cell population type above the histograms. Representative histograms of different myeloid populations stained with specific antibodies (white) and isotype control antibodies (gray).

Fig. S3.

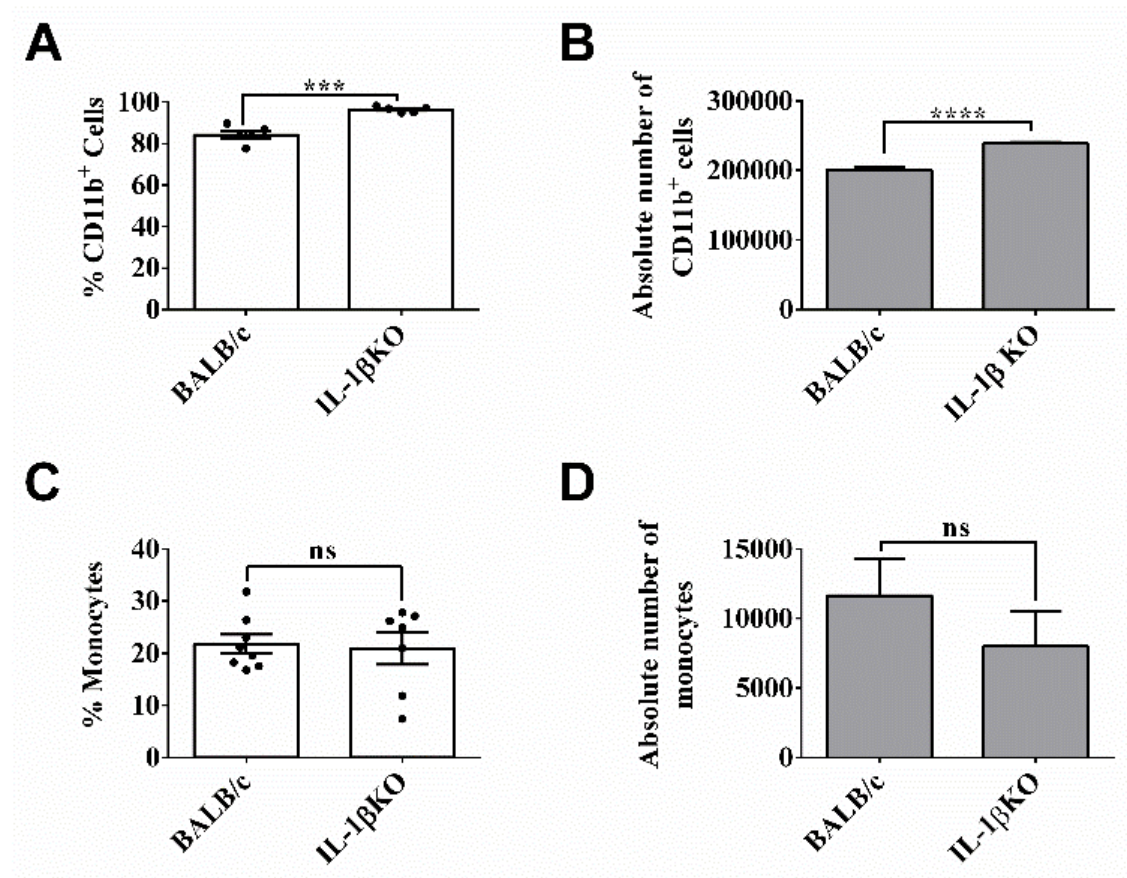

**Myeloid cells and monocytes in tumor microenvironment.** On day 12 after 4T1 cell injection, BALB/c and IL-1 $\beta$  KO mice were sacrificed and single-cell suspension from the primary tumors was prepared as described (methods). (A) Percentage of CD11b<sup>+</sup> cells from CD45<sup>+</sup> cells. (B) The absolute number of CD11b<sup>+</sup> cells from 250,000 CD45<sup>+</sup>. (C) Percentage of monocytes from CD11b<sup>+</sup>Ly6G<sup>+</sup>SSC<sup>low</sup> cells. (D) The absolute number of monocytes cells from 250,000 CD45<sup>+</sup> cells. Graphs show mean  $\pm$  SEM, n=4-8, ns, not significant, \*\*\*, p<0.001, \*\*\*\*, p<0.0001.

**Table S1. List of Primers for qPCR**

| Gene         | Forward                | Reverse                 |
|--------------|------------------------|-------------------------|
| <i>CCL2</i>  | AGGTCCTGTGTCATGCTTCTG  | TCTGGACCCATTCCTTCTTG    |
| <i>CSF1</i>  | CTTCATGCCAGATTGCCTTT   | TCATGGAAAGTTCGGACACA    |
| <i>CD8A</i>  | TCAGTTCTGTGTCGTGCCAGTC | ATCACAGGCGAAGTCCAATC    |
| <i>GZMB</i>  | GGGAGATCATCGGGGACA     | GCCCCACATATCGCCTCAG     |
| <i>ITGAM</i> | AGTGCTGGGAGACGTGAATG   | CACTCAGAGACTGCCCGAAG    |
| <i>IL10</i>  | GGGAAGACAATAACTGCACCCA | TGTTTGAAAGAAAGTCTTCACCT |
| <i>IL12A</i> | TCTTTGATGATGACCCTGTGC  | TCTCCCACAGGAGGTTTCTG    |
| <i>IL12B</i> | CACACTGGACCAAAGGGACT   | CAGCACCAGCTTCTTCATCA    |
| <i>ACTB</i>  | GCATTGTTACCAACTGGGAC   | GGTCTCAAACATGATGTGGG    |

**Table S2. List of Flow cytometry antibodies**

| Antigen              | Clone       | Source               |
|----------------------|-------------|----------------------|
| CD45                 | 30-F11      | Biogems, eBioscience |
| CD11b                | M1/70       | Biogems, eBioscience |
| Ly6C                 | HK1.4       | eBioscience          |
| Gr1                  | RB6-8C5     | eBioscience          |
| Ly6G                 | 1A8         | Biolegend            |
| CD64                 | X54-5/7.1   | Biolegend            |
| IA/IE                | M5/114.15.2 | eBioscience          |
| CD206 (MMR)          | C068C2      | Biolegend            |
| FcεRIα               | MAR1        | Biolegend            |
| CD11c                | N418        | eBioscience          |
| IL-12/IL-23 p40      | C17.8       | eBioscience          |
| CD40                 | 3/23        | BD Bioscience        |
| IL-10                | JES5 16E3   | eBioscience          |
| CCR2                 | 475301      | R&D systems          |
| CD3                  | 145-2C11    | eBioscience          |
| CD4                  | GK1.5       | eBioscience          |
| CD8                  | 53-6.7      | eBioscience          |
| F4/80                | BM8         | eBioscience          |
| TNFα                 | MP6-XT22    | eBioscience          |
| IFNγ                 | XMG1.2      | eBioscience          |
| SiglecF (CD170)      | 1RNM44N     | eBioscience          |
| CD80                 | 16-10A1     | eBioscience          |
| Rat IgG2a            | eBR2a       | eBioscience          |
| Rat IgG2b, κ         | eB149/10H5  | eBioscience          |
| Rat IgG1             | BRG1        | eBioscience          |
| Armenian hamster IgG | eBio299Arm  | eBioscience          |
| Mouse IgG1, κ        | MOPC-21     | Biolegend            |
